# Supplementary material for: Methyl divanillate: redox properties and binding affinity with albumin of an antioxidant and potential NADPH oxidase inhibitor
Source: PubMed Central journal article supplement (PMC9065500; doi:10.1039/c9ra02465d), 2019-06-26
Supplement: RA-009-C9RA02465D-s001.pdf [file RA-009-C9RA02465D-s001.pdf]

Electronic Supplementary Information

Methyl divanillate: Redox properties and binding affinity with albumin of an antioxidant and potential NADPH oxidase inhibitor

Débora Naliati de Vasconcelos<sup>1</sup>, Angélica Nakagawa Lima<sup>2</sup>, Eric Allison Philot<sup>2</sup>, Ana Lígia Scott<sup>2</sup>,  
Izabelle Amorim Ferreira Boza<sup>1</sup>, Aguinaldo Robinson de Souza<sup>1</sup>, Nelson Henrique Morgon<sup>3</sup>,  
Valdecir Farias Ximenes<sup>1,\*</sup>

<sup>1</sup>Department of Chemistry, Faculty of Sciences, UNESP - São Paulo State University, 17033-360, Bauru, São Paulo, Brazil.

<sup>2</sup>Laboratory of Computational Biology and Bioinformatics, UFABC – Federal University of ABC, 09210-580, Santo André, SP, Brazil.

<sup>3</sup>Department of Physical Chemistry, Institute of Chemistry, Campinas State University (UNICAMP), 13083-861, Campinas, São Paulo, Brazil.

\*Correspondence should be addressed to Valdecir Farias Ximenes.

Tel.: +55 14 3301-6088

<http://orcid.org/0000-0003-2636-3080>

Email: [valdecir.ximenes@unesp.br](mailto:valdecir.ximenes@unesp.br)

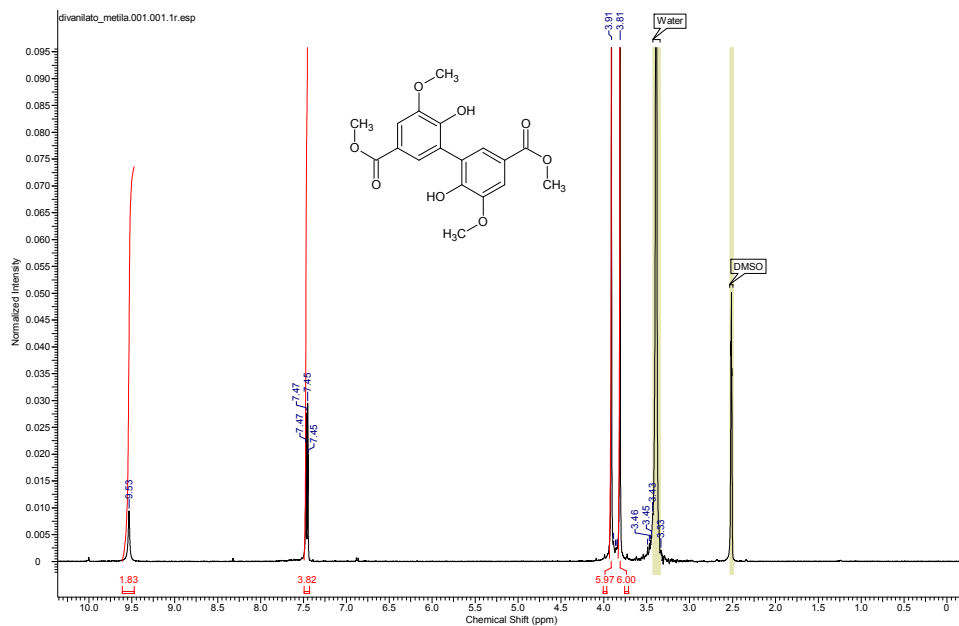

**Fig. S1.**  $^1\text{H}$  NMR (400 MHz) spectrum of methyl divanillate.  $^1\text{H}$  NMR (400 MHz)  $\delta$  (ppm): (d) 9.53 (s, 2OH), 7.47 (d, 2CH-Ar,  $J=2.0$  Hz), 7.44 (d, 2CH-Ar,  $J=2.0$  Hz), 3.91 (s, 2 OCH<sub>3</sub>), 3.81 (s, 2 OCH<sub>3</sub>).

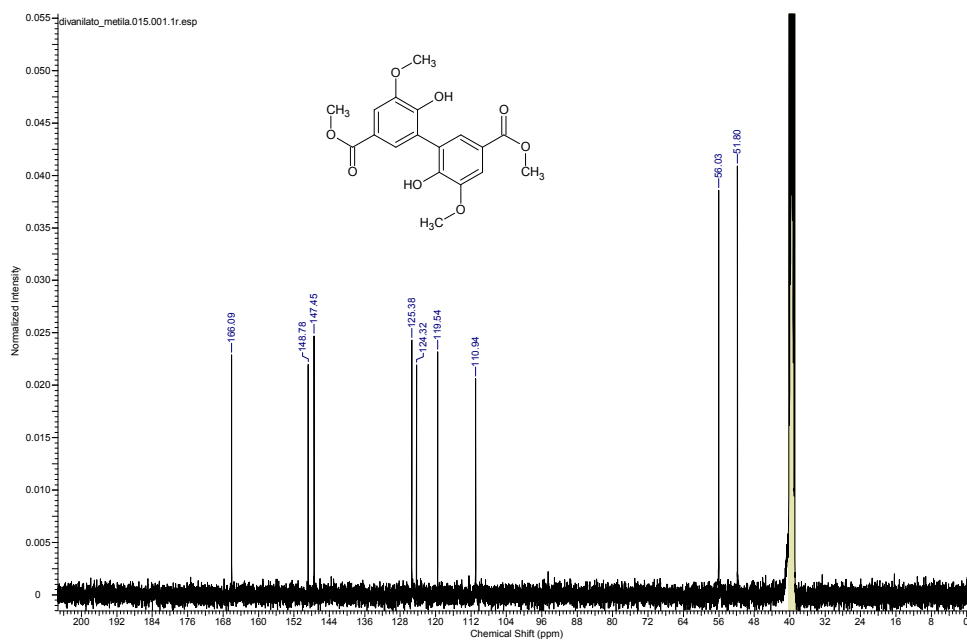

**Fig. S2.**  $^{13}\text{C}$  NMR (100 MHz, DMSO-D<sub>6</sub>)  $\delta$  (ppm): 166.1 (2C=O), 148.8 (2C), 147.4 (2C), 125.4 (2CH), 124.3 (2C), 119.5 (2C), 110.9 (2CH), 56.0 (2OCH<sub>3</sub>), 51.8 (2OCH<sub>3</sub>).

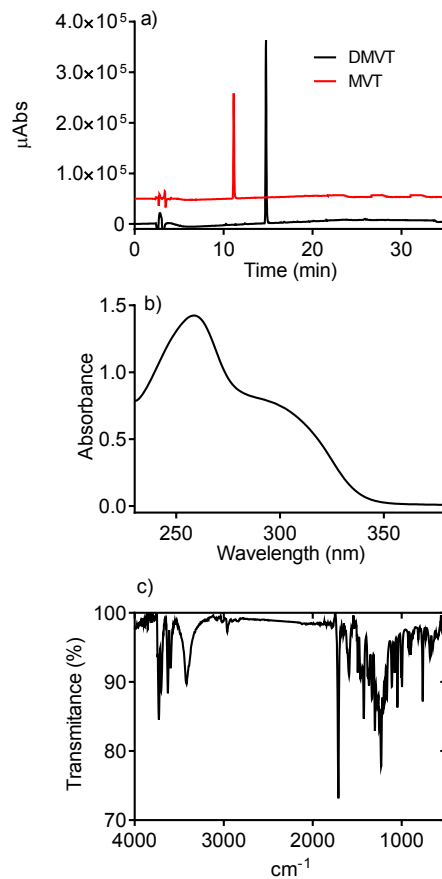

**Fig. S3.** a) Chromatogram of purified methyl divanillate (DMV) and its precursor methyl vanillate (MV). b) UV-Vis spectrum of DMV. c) FTIR spectrum of DMV.

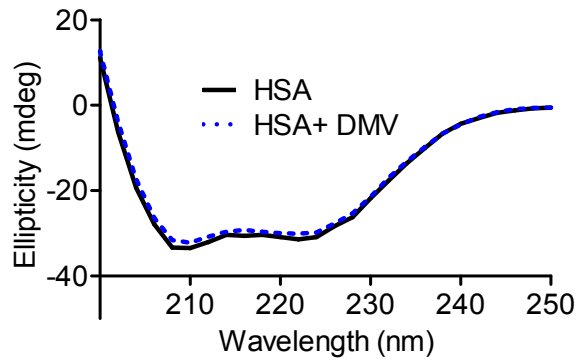

**Fig. S4.** Far-UV-CD spectra of HSA in the absence and presence of DMV. HSA  $30 \mu\text{mol L}^{-1}$ , and DMV  $30 \mu\text{mol L}^{-1}$  were incubated for 10 min and then diluted to  $0.5 \mu\text{mol L}^{-1}$  before measurement.

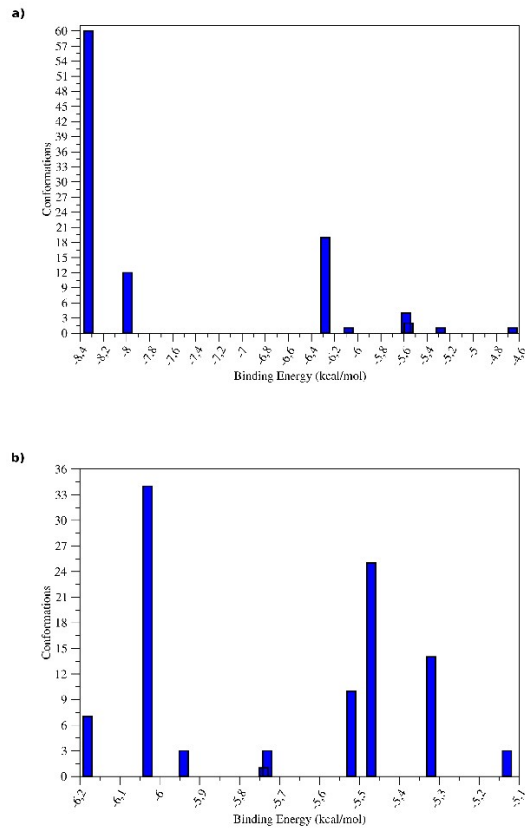

**Fig. S5.** Minimum energies and number of poses for each cluster of DMV obtained for the crystallographic structure 1AO6. **(a)** site I and **(b)** site II.

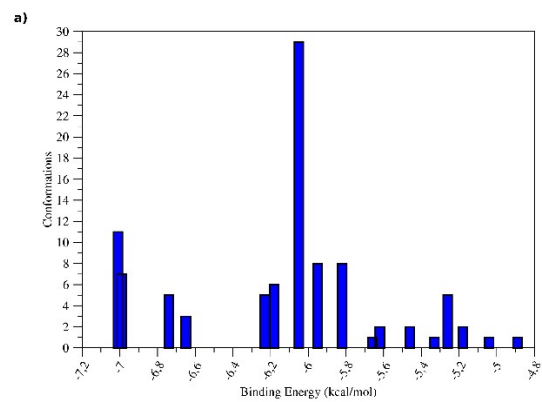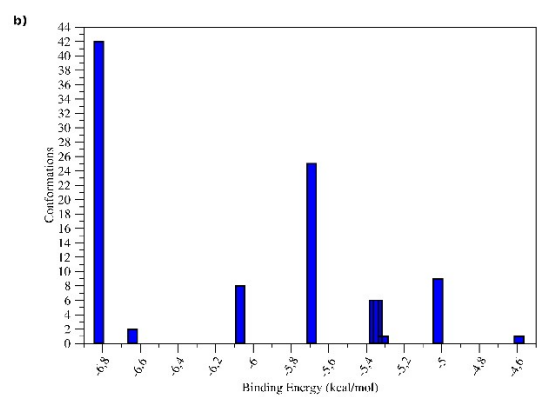

**Fig. S6.** Minimum energies and number of poses for each cluster of DMV obtained for the crystallographic structure 1E7A. **(a)** site I and **(b)** site II.

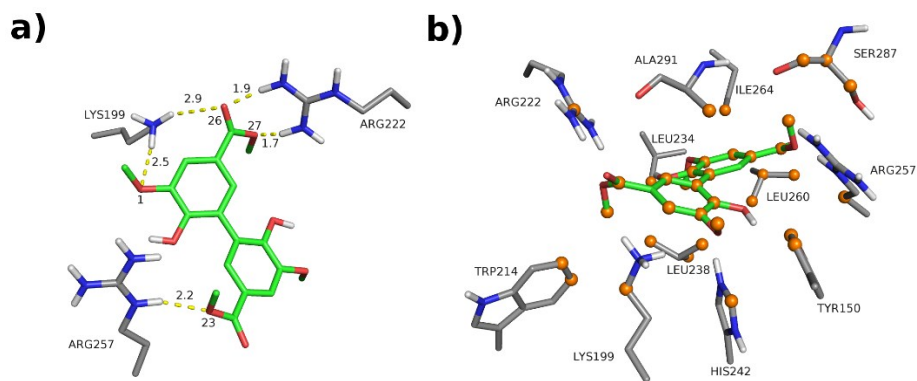

**Fig. S7.** Intermolecular interactions of DMV at site I of HSA (PDB 1E7A). The results represent the lower energy cluster (Cl-1). a) Hydrogen bonds; b) Hydrophobic contacts.

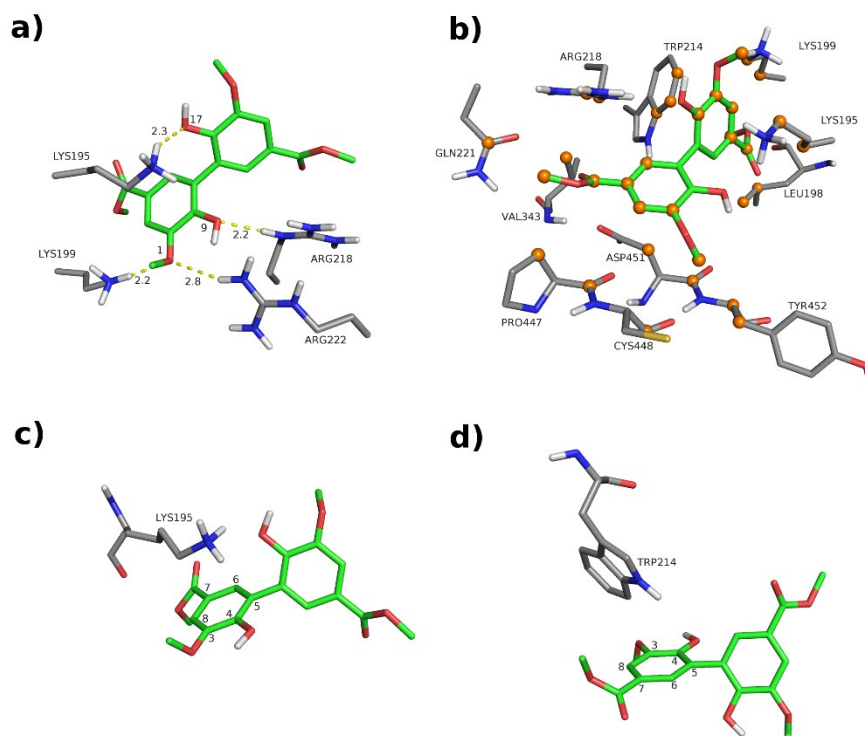

**Fig. S8.** Intermolecular interactions of DMV at site I of HSA (PDB 1E7A). The results represent the most populous cluster (Cl-8). a) Hydrogen bonds; b) Hydrophobic contacts; c) cation- $\pi$ ; d)  $\pi$ - $\pi$  T-shaped.

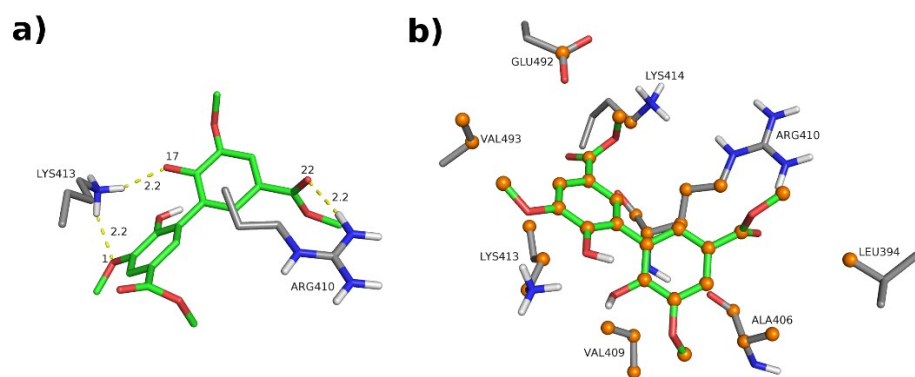

**Fig. S9.** Intermolecular interactions of DMV at site II of HSA (PDB 1A06). The results represent the most populous cluster (Cl-2). a) Hydrogen bonds; b) Hydrophobic contacts.

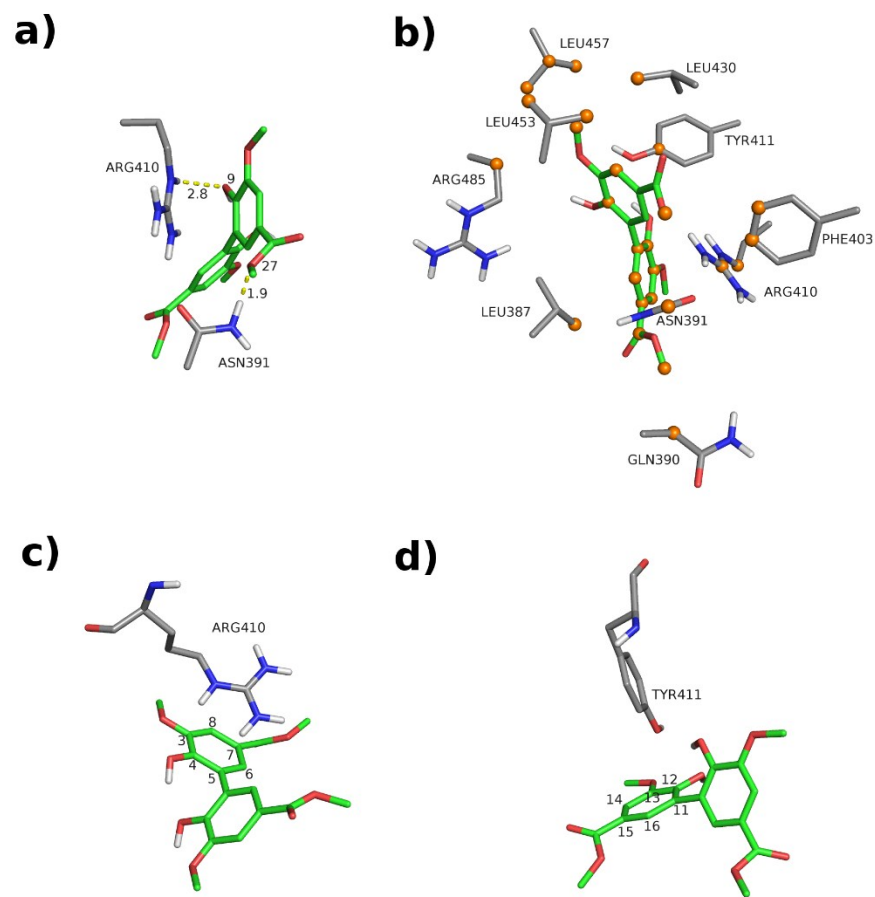

**Fig. S10.** Intermolecular interactions of DMV at site II of HSA (PDB 1E7A). The results represent the most populous and lower energy cluster (Cl-1). a) Hydrogen bonds; b) Hydrophobic contacts; c) cation- $\pi$ ; d)  $\pi$ - $\pi$  T-shaped.



**Table S1: Cytotoxicity of MV and DMV on peripheral blood neutrophil.**

| Compound   | Cell Viability (%)*      |                |                |                 |
|------------|--------------------------|----------------|----------------|-----------------|
|            | Concentration ( $\mu$ M) |                |                |                 |
|            | 0.1                      | 1.0            | 10.0           | 100.0           |
| <b>MV</b>  | 100,0 $\pm$ 0,0          | 96,4 $\pm$ 2,4 | 94,1 $\pm$ 1,4 | 82,2 $\pm$ 3,2* |
| <b>DMV</b> | 100,0 $\pm$ 0,0          | 98,1 $\pm$ 1,3 | 95,4 $\pm$ 2,1 | 84,3 $\pm$ 4,1  |

\*The results are mean and SD of triplicates.

### **Experimental procedure**

The viability of neutrophil was assessed by using the MTT assay.<sup>1</sup> The neutrophils were isolated from peripheral blood of healthy donors using the double-gradient Histopaque<sup>®</sup>-1077/1119 protocol.<sup>2</sup> Neutrophils ( $1 \times 10^6$  cell/mL) were incubated in the absence or presence of MV and DMV in 500  $\mu$ L PBS for 90 minutes at 37°C. Then, the cell suspensions were centrifuged at 4000 rpm for 5 minutes and the supernatant discarded. 500  $\mu$ L of MTT (1 mg/mL) was added and the suspension incubated at 37°C for three hours, after which the medium was replaced with 100  $\mu$ L of DMSO to dissolve formazan crystals. The absorbance was measured at 550 nm using a microplate reader and subtracted with the absorbance at 650 nm. The cell viability was determined as the capability of the cells to convert MTT into formazan product. Data were expressed as the percent viability compared with the control.

**Table S2.** Number of interactions at site I and site II.

|            | Site I    |           |           | Site II   |           |           |
|------------|-----------|-----------|-----------|-----------|-----------|-----------|
|            | 1A06 CI 1 | 1E7A CI 1 | 1E7A CI 8 | 1A06 CI 1 | 1A06 CI 2 | 1E7A CI 1 |
| <b>HB</b>  | 4         | 5         | 4         | 3         | 3         | 2         |
| <b>HC</b>  | 44        | 33        | 33        | 47        | 38        | 25        |
| <b>PIS</b> | ---       | ---       | ---       | ---       | ---       | ---       |
| <b>PIT</b> | ---       | ---       | 2         | ---       | ---       | 1         |
| <b>CPI</b> | ---       | ---       | 1         | ---       | ---       | 1         |
| <b>SB</b>  | ---       | ---       | ---       | ---       | ---       | ---       |

HC: hydrophobic contact | PIT:  $\pi$ - $\pi$  T-shaped | PIS:  $\pi$ - $\pi$  stacking | HB: hydrogen bonding

SB: salt bridge | CPI: cation- $\pi$

**Table S3.** Specific interactions between DMV and the amino acid residues at site I and site II.

| Residue  | Site I    |           |           | Residue  | Site II   |           |           |
|----------|-----------|-----------|-----------|----------|-----------|-----------|-----------|
|          | 1A06 CI 1 | 1E7A CI 1 | 1E7A CI 8 |          | 1A06 CI 1 | 1A06 CI 2 | 1E7A CI 1 |
| TYR(150) | HC        | HC        | ---       | LEU(259) | HC        | ---       | ---       |
| LYS(195) | ---       | ---       | HB/HC/CPI | LEU(387) | ---       | ---       | HC        |
| LEU(198) | ---       | ---       | HC        | GLN(390) | ---       | ---       | HC        |
| LYS(199) | HB/HC     | HB/HC     | HB/HC     | ASN(391) | ---       | ---       | HB/HC     |
| TRP(214) | HC        | HC        | HC/PIT    | LEU(394) | ---       | HC        | ---       |
| ARG(218) | HC        | ---       | HB/HC     | PHE(403) | ---       | ---       | HC        |
| LEU(219) | HC        | ---       | ---       | ASN(405) | HB/HC     | ---       | ---       |
| GLN(221) | ---       | ---       | HC        | ALA(406) | HC        | HC        | ---       |
| ARG(222) | HB        | HB/HC     | HB        | VAL(409) | HC        | HC        | ---       |
| PHE(223) | HC        | ---       | ---       | ARG(410) | HC        | HB/HC     | HB/HC/CP  |

|          |       |       |     |          |       |       |        |
|----------|-------|-------|-----|----------|-------|-------|--------|
|          |       |       |     |          |       |       | I      |
| LEU(234) | HC    | HC    | --- | TYR(411) | ---   | ---   | HC/PIT |
| LEU(238) | HC    | HC    | --- | LYS(413) | ---   | HB/HC | ---    |
| HIS(242) | ---   | HC    | --- | LYS(414) | ---   | HC    | ---    |
| ARG(257) | HB/HC | HB/HC | --- | LEU(430) | ---   | ---   | HC     |
| LEU(260) | HC    | HC    | --- | LEU(453) | ---   | ---   | HC     |
| ALA(261) | HC    | ---   | --- | LEU(457) | ---   | ---   | HC     |
| ILE(264) | HC    | HC    | --- | ARG(485) | ---   | ---   | HC     |
| SER(287) | HC    | HC    | --- | GLU(492) | ---   | HC    | ---    |
| ILE(290) | HC    | ---   | --- | VAL(493) | ---   | HC    | ---    |
| ALA(291) | HC    | HC    | --- | LEU(529) | HC    | ---   | ---    |
| VAL(343) | ---   | ---   | HC  | LEU(544) | HC    | ---   | ---    |
| PRO(447) | ---   | ---   | HC  | LYS(545) | HB/HC | ---   | ---    |
| CYS(448) | ---   | ---   | HC  | MET(548) | HC    | ---   | ---    |
| ASP(451) | ---   | ---   | HC  |          |       |       |        |
| TYR(452) | ---   | ---   | HC  |          |       |       |        |

HC: hydrophobic contact | PIT:  $\pi$ - $\pi$  T-shaped | PIS:  $\pi$ - $\pi$  stacking | HB: hydrogen bonding

SB: salt bridge | CPI: cation- $\pi$

## References

1. FERRARI, M.; FORNASIERO, M.C., ISETTA, A. M. MTT colorimetric assay for testing macrophage cytotoxic activity in vitro. *J. Immunol. Methods*, v. 131, n.2, p. 165-72, 1990.
2. D. English and B. R. Andersen, Single-step separation of red blood cells. Granulocytes and mononuclear leukocytes on discontinuous density gradients of Ficoll-Hypaque, *J. Immunol. Methods*, 1974, 5, 249–252.
